# Supplementary material for: Mitochondrial Phylogenomics Suggests Complex Evolutionary Pattern of Pronotal Foliaceous Mimicry in Hierodulinae (Mantodea: Mantidae), with Description of a New Species of Rhombodera Burmeister, 1838 from China
Source: MDPI journal article supplement (doi:10.3390/insects13080715), 2022-08-09
Supplement: s1 [file s1]

## Supplementary materials

Table S1. Taxa used in present study from GenBank.

|          | Family        | Species                             | GenBank<br>number |
|----------|---------------|-------------------------------------|-------------------|
| Ingroup  |               |                                     |                   |
|          | Mantidae      | <i>Mekongomantis quinquespinosa</i> | MN267041          |
|          |               | <i>Hierodula membranacea</i>        | KR703239          |
|          |               | <i>Hierodula membranacea</i>        | NC_048984         |
|          |               | <i>Hierodula patellifera</i>        | KX091856          |
|          |               | <i>Hierodula patellifera</i>        | KX611803          |
|          |               | <i>Hierodula patellifera</i>        | NC_034283         |
|          |               | <i>Rhombomantis fusca</i>           | KY689124          |
|          |               | <i>Rhombomantis fusca</i>           | NC_034282         |
|          |               | <i>Rhombodera latipronotum</i>      | KX091864          |
|          |               | <i>Rhombodera valida</i>            | NC_034284         |
|          |               | <i>Hierodula chinensis</i>          | KY689112          |
|          |               | <i>Rhombodera zhang</i>             | MW357299          |
|          |               | <i>Rhombodera longa</i>             | MT110155          |
|          |               | <i>Pseudovates peruviana</i>        | MW357301          |
|          |               | <i>Sphodromantis lineola</i>        | NC_037204         |
|          |               | <i>Stagmatoptera biocellata</i>     | MW357302          |
|          |               | <i>Statilia</i> sp.                 | KU201316          |
|          |               | <i>Statilia maculata</i>            | KX900484          |
|          |               | <i>Tarachomantis alaotrana</i>      | NC_056875         |
|          |               | <i>Mantis religiosa</i>             | MN356097          |
|          |               | <i>Tenodera sinensis</i>            | KY689132          |
|          | Hymenopodidae | <i>Acromantis hesione</i>           | KX434865          |
|          |               | <i>Anaxarcha sinensis</i>           | KX434866          |
|          |               | <i>Ceratomantis saussurii</i>       | KX091850          |
|          |               | <i>Creobroter elongata</i>          | KX091851          |
|          |               | <i>Creobroter gemmatus</i>          | KU201319          |
|          |               | <i>Astyliasula hoffmanni</i>        | KX434859          |
|          |               | <i>Hestiasula</i> sp.               | KX091855          |
|          |               | <i>Hymenopus coronatus</i>          | MZ573776          |
|          |               | <i>Phyllothelys shaanxiense</i>     | KX091863          |
| Outgroup |               |                                     |                   |
|          | Toxoderidae   | <i>Toxodera hauseri</i>             | KX434837          |
|          |               | <i>Stenotoxodera porioni</i>        | KY689118          |
|          | Amelidae      | <i>Yersinia mexicana</i>            | MW357303          |

Table S2. Collection information and accession number of the ingroups species sequenced in the present study.

| Species                            | Locality                                      | Time        | Identification | Accession |
|------------------------------------|-----------------------------------------------|-------------|----------------|-----------|
| <i>Hierodula chinensis</i>         | Qingchengshan, Sichuan China                  | 2018-IV-16  | [37]           | OP108446  |
| <i>Hierodula confusa</i>           | Menglun, Mengla, Xishuangbanna, Yunnan, China | 2018-VII-1  | [36]           | OP168273  |
| <i>Hierodula jianfenglingensis</i> | Ledong Li, Hainan, China                      | 2020-XII-19 | [37]           | OP168274  |
| <i>Hierodula latipennis</i>        | Yiwu, Mengla, Xishuangbanna, Yunnan, China    | 2018-VII-2  | [12]           | OP168275  |
| <i>Hierodula membranacea</i>       | India                                         | 2021-XII-12 | [10]           | OP168276  |
| <i>Rhombodera kirbyi</i>           | Indonesia                                     | 2020-IV     | [38]           | OP168284  |
| <i>Rhombodera latipronotum</i>     | Menglun, Yunnan, China                        | 2021-XI-21  | [39]           | OP168278  |
| <i>Rhombodera latipronotum</i>     | Fangchenggang, Guangxi, China                 | 2020-IV     | [39]           | OP168277  |
| <i>Rhombodera longa</i>            | Xishuangbanna Dai, Yunnan, China              | 2021-IV-20  | [12]           | OP168279  |
| <i>Rhombomantis longipennis</i>    | Dehong, Yingjiang, Yunnan China               | 2021-VII-1  | [12]           | OP168283  |
| <i>Rhombodera megaera</i>          | Muang Krabi, Thailand                         | 2019-I-14   | [10]           | OP168287  |
| <i>Rhombodera hyalina</i>          | Qinzhou, Guangxi, China                       | 2020-XII-17 | This study     | OP168286  |
| <i>Rhombodera stalii</i>           | Java, Indonesia                               | 2019-XII-8  | [4]            | OP168280  |
| <i>Rhombodera valida</i>           | Mengla, Xishuangbanna, Yunnan, China          | 2017-IV-19  | [10]           | OP168282  |
| <i>Rhombodera valida</i>           | Java, Indonesia                               | 2019-XII    | [10]           | OP168281  |
| <i>Rhombodera zhangii</i>          | Dehong, Yingjiang, Yunnan, China              | 2021-VIII   | [40]           | OP168285  |

# Additional Material Examined

*Rhombodera valida* Burmeister, 1838

**Material examined.** 1m#, CHINA, Mengla, Xishuangbanna, Yunnan, 2017-iv-19, leg. Chao Wu; 2f#, Jinghong, Xishuangbanna, Yunnan, 2021-x-26, leg. Guozhong Yang; 1m#, Java, Indonesia, 2019-xii.

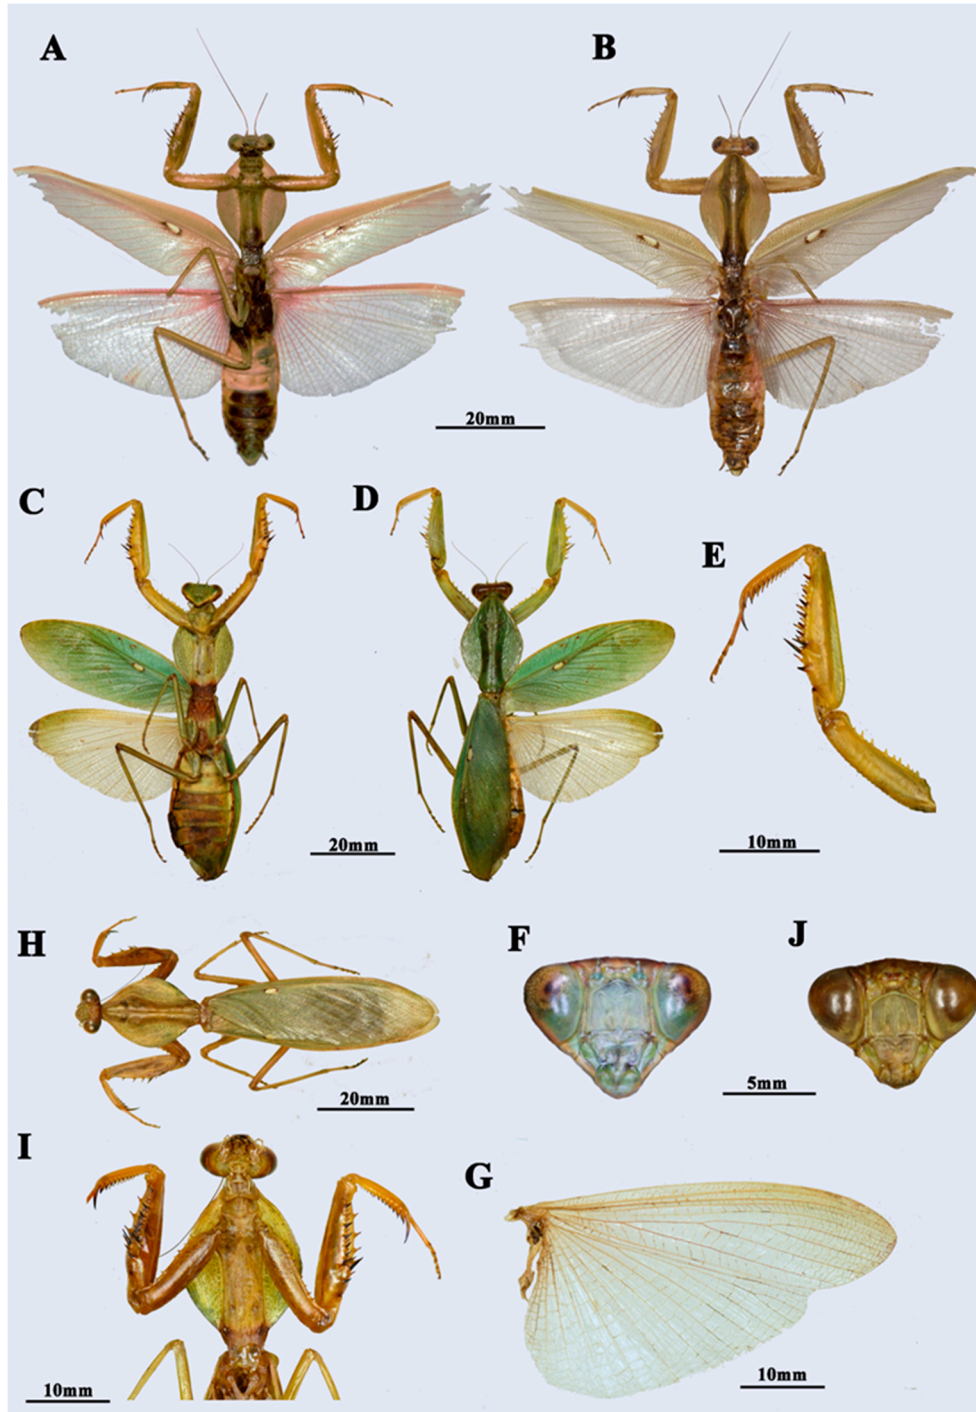

Figure S1. *Rhombodera valida*. A–B. *R. valida* from Java, Indonesia, male. A. Ventral view. B. Dorsal view. C–F. *R. valida* from Yunnan, China, female. C. Ventral view. D. Dorsal view. E. Ventral view of the forelegs. F. Frontal view of head. J–G. *R. valida* from Yunnan, China, male. J. Frontal view of the head. H. Dorsal view. I. Ventral view. G. Hindwing.

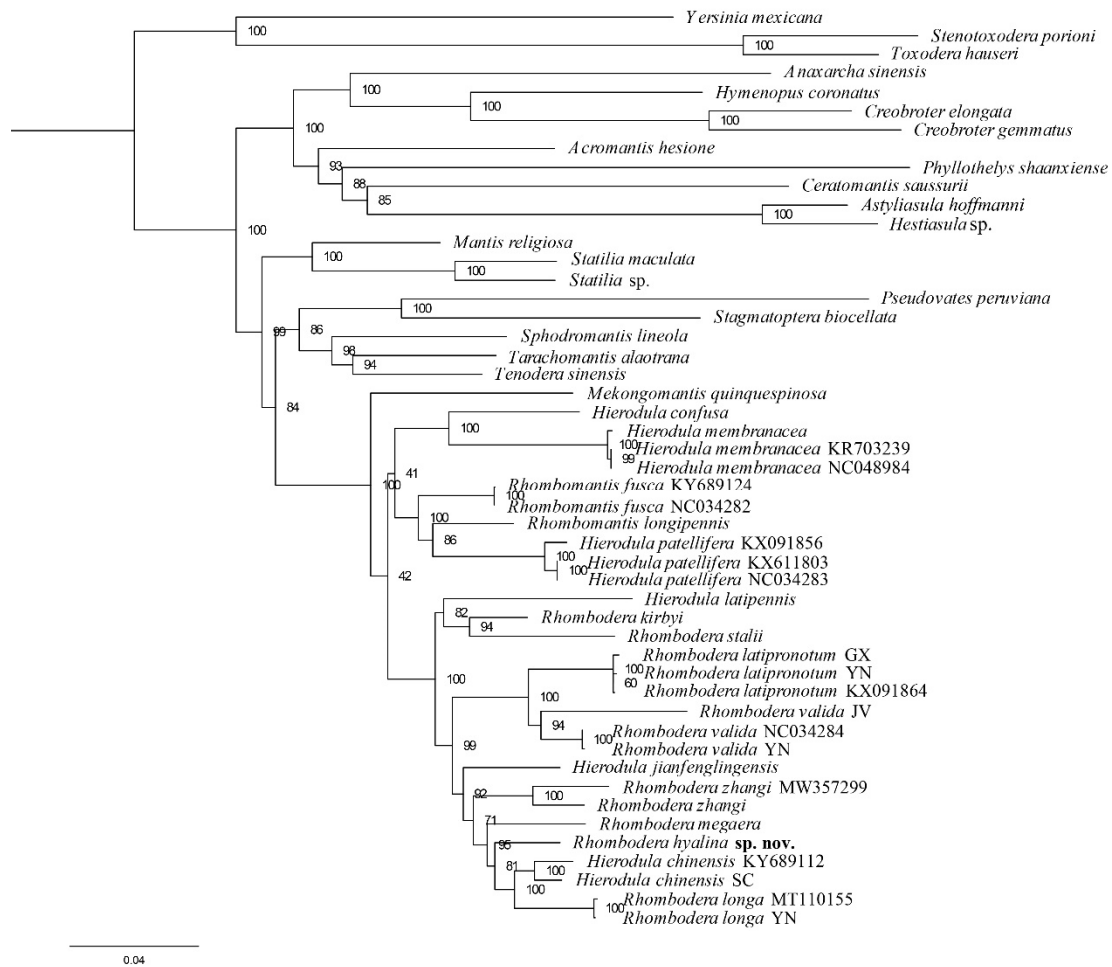

Figure S2. Topology of the ML analysis from AA-no partition dataset.

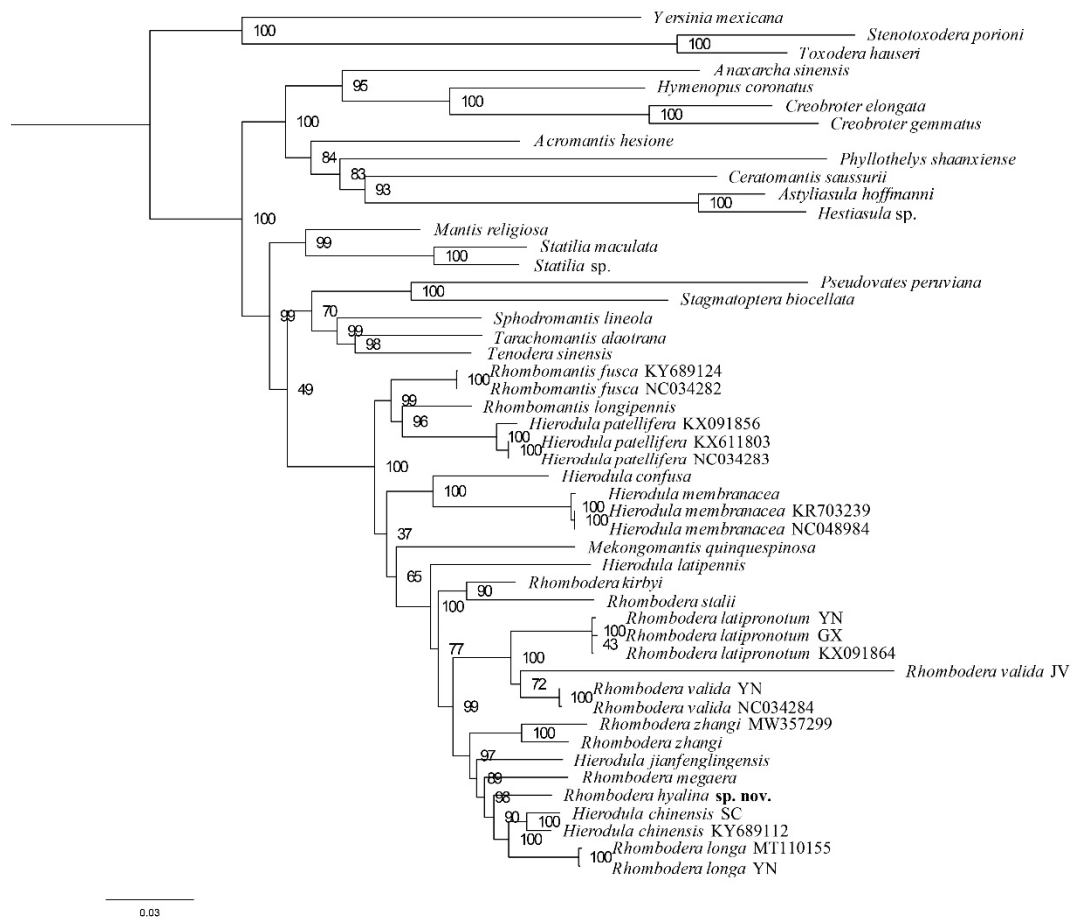

Figure S3. Topology of the ML analysis from AA-gene partition dataset.

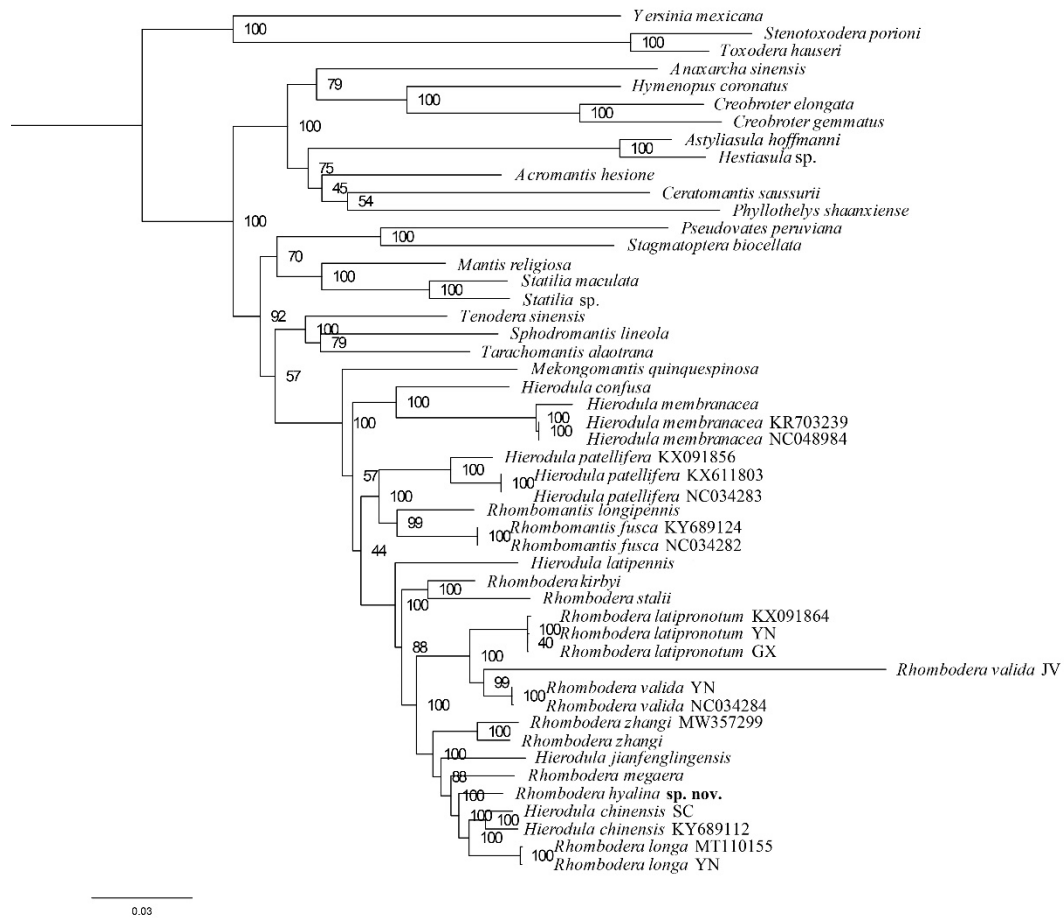

Figure S4. Topology of the ML analysis from PCG12RNA-gene partition dataset.

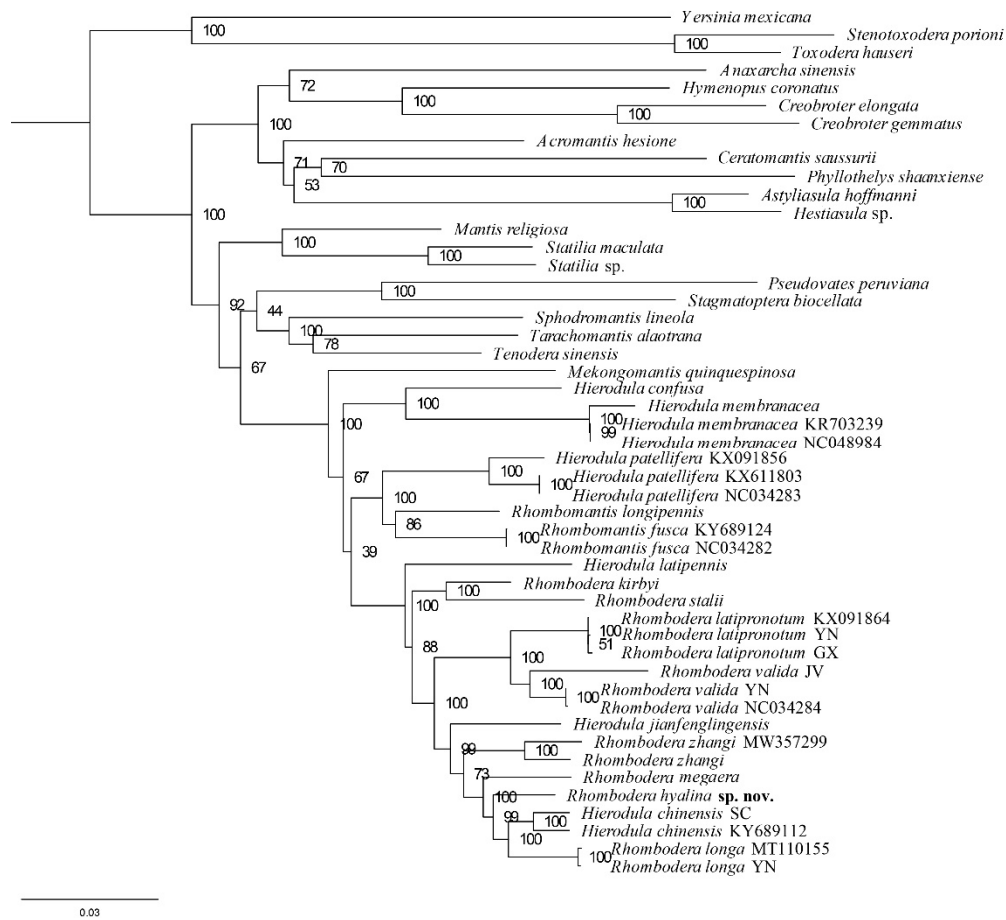

Figure S5. Topology of the ML analysis from PCG12RNA-no partition dataset.

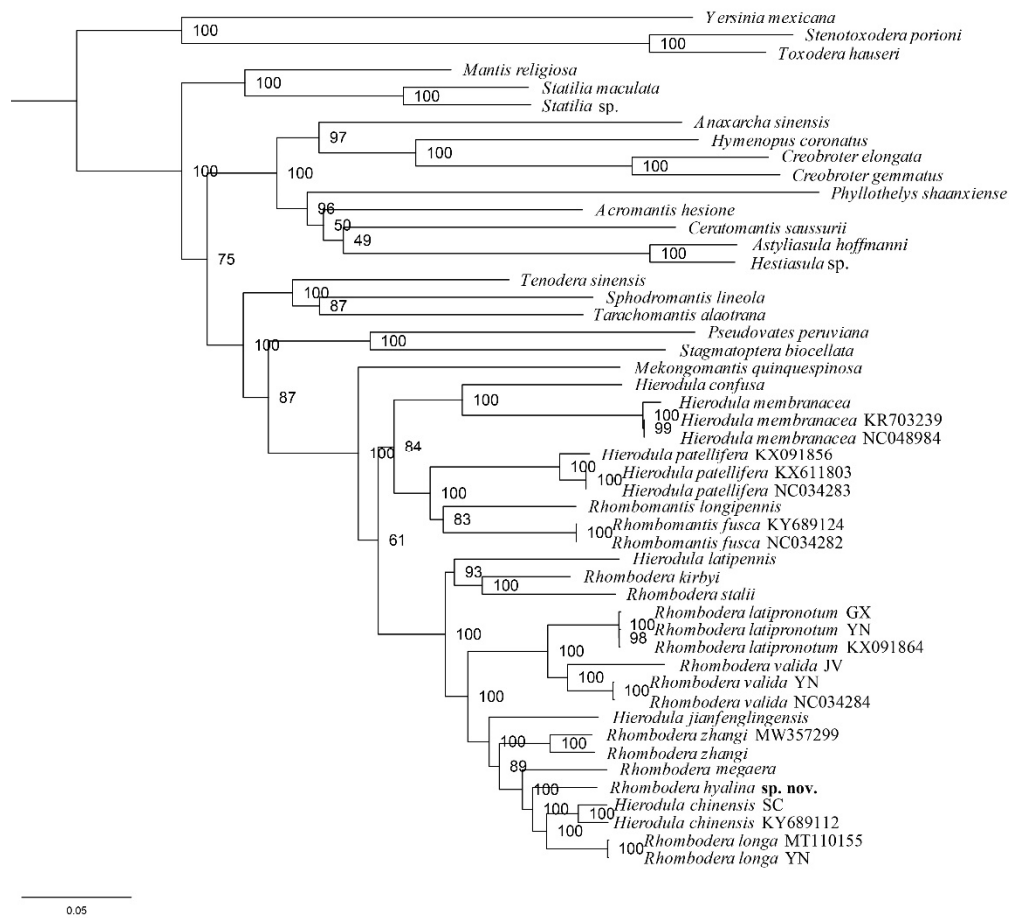

Figure S6. Topology of the ML analysis from PCGRNA-no partition dataset.



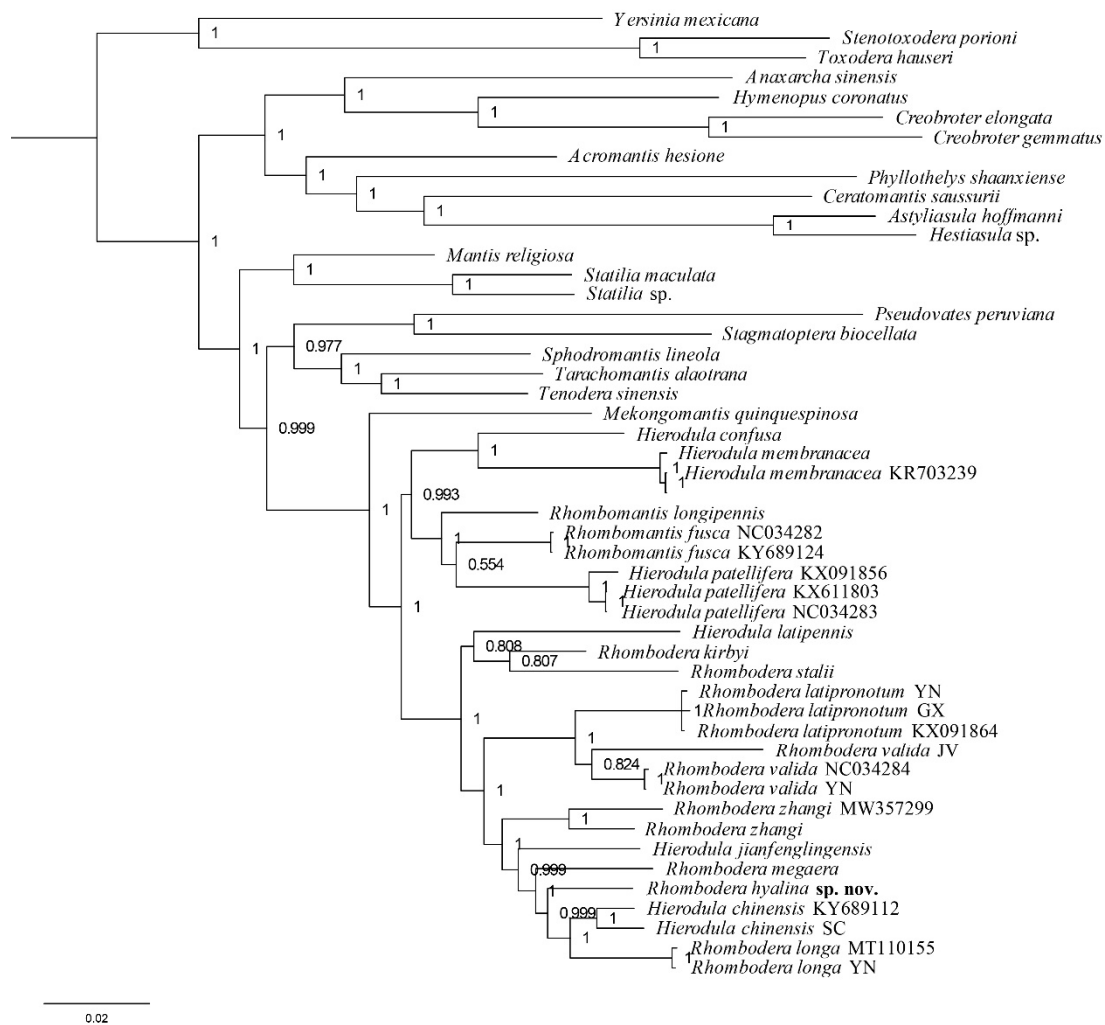

Figure S7. Topology of the BI analysis from AA-no partition dataset.

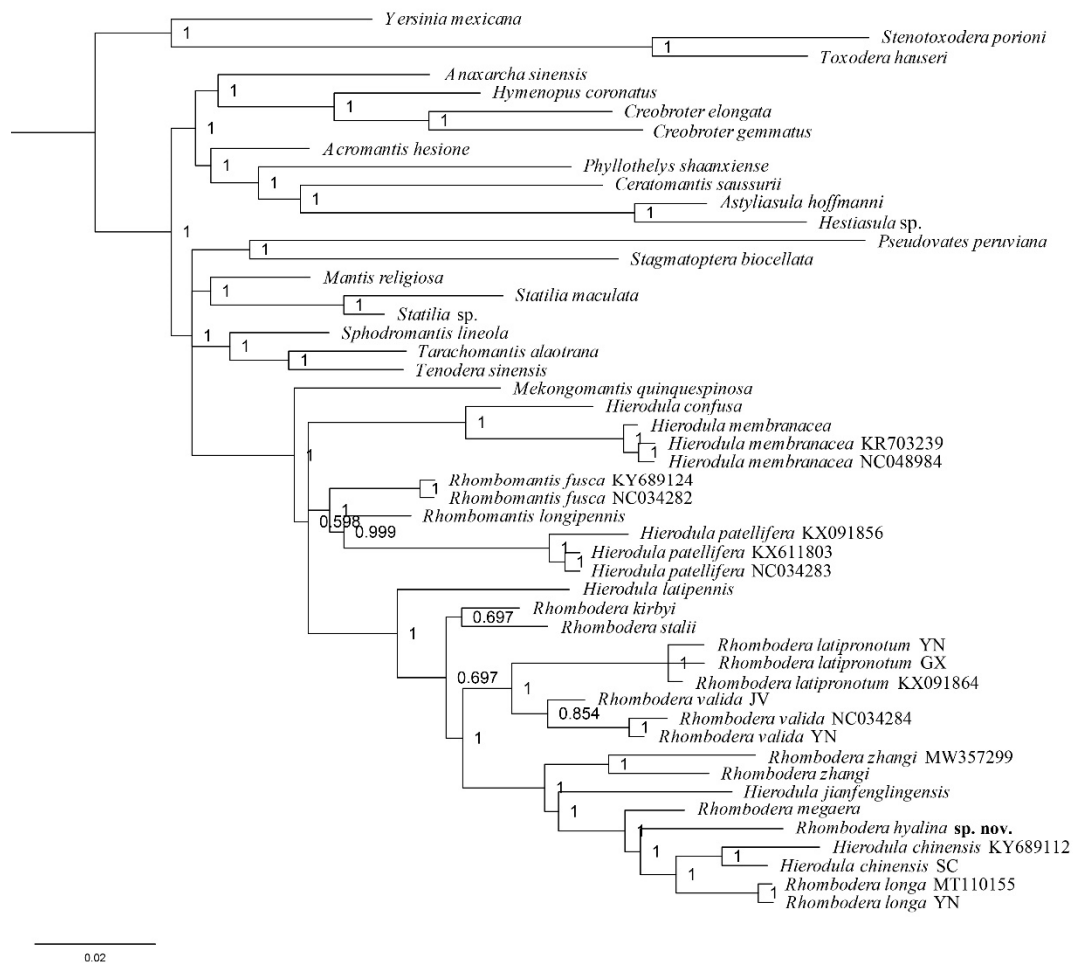

Figure S8. Topology of the BI analysis from AA-gene partition dataset.

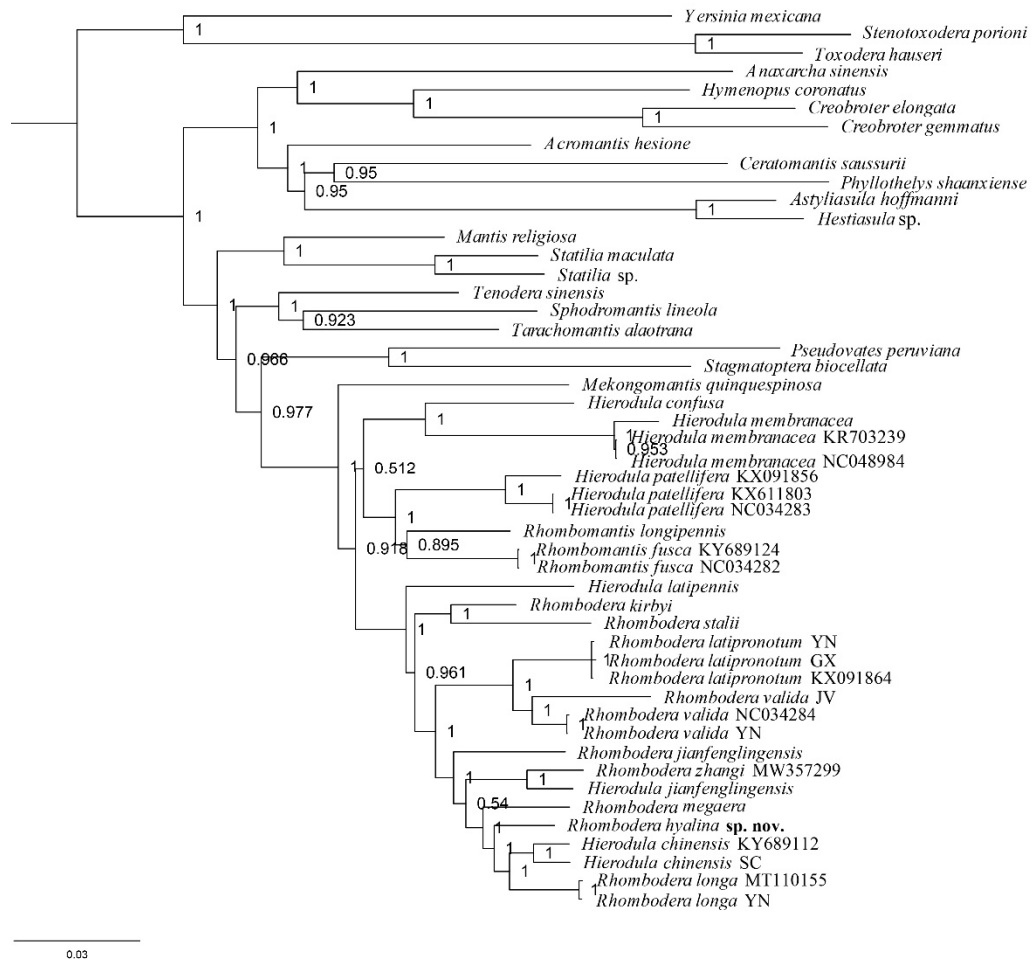

Figure S9. Topology of the BI analysis from PCG12RNA-gene partition dataset.

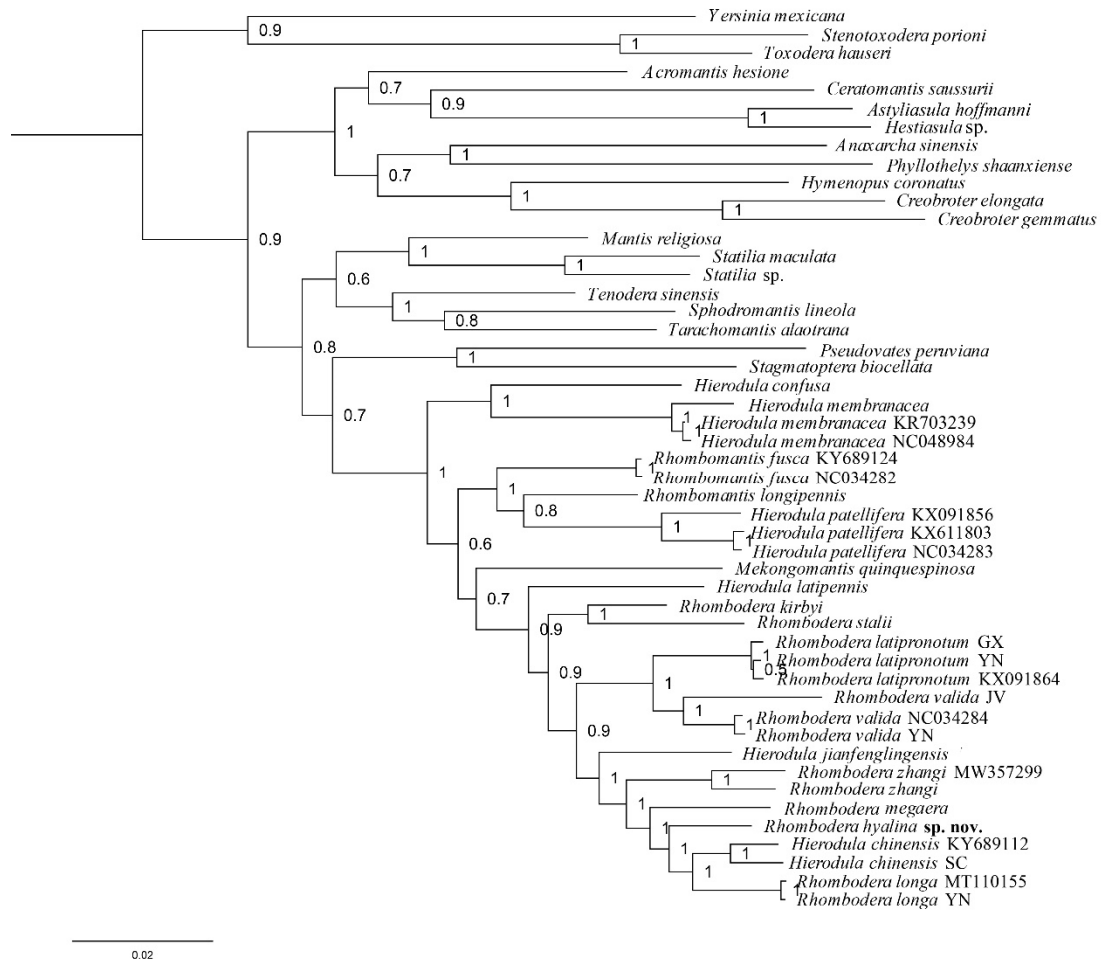

Figure S10. Topology of the BI analysis from PCG12RNA-no partition dataset.
